# Supplementary material for: The Genome Sequence ofMethanohalophilus mahiiSLPTReveals Differences in the Energy Metabolism among Members of theMethanosarcinaceaeInhabiting Freshwater and Saline Environments
Source: Hindawi journal article supplement (doi:10.1155/2010/690737), 2010-01-01
Supplement: f1 [file 690737.f1.pdf]

## Supplementary Material

**Supplementary Table 1.** Genome sequencing project information.

| <b>MIGS ID</b>       | <b>Property</b>            | <b>Term</b>                          |
|----------------------|----------------------------|--------------------------------------|
| MIGS-31 Finishing    | quality                    | Finished                             |
| MIGS-28 Libraries    | used                       | One genomic 6 kb pMCL Sanger library |
| MIGS-29 Sequencing   | platforms                  | ABI3730                              |
| MIGS-31.2 Sequencing | coverage                   | 8.0 Sanger                           |
| MIGS-30 Assem        | blers                      | phrap                                |
| MIGS-32 Gene         | calling method             | Prodigal 1.4, GenePRIMP              |
| GenBank              | ID                         | CP001994                             |
|                      | GenBank Date of Release    | April 12, 2010                       |
| GOLD                 | ID                         | <a href="#">Gc01255</a>              |
|                      | NCBI project ID            | <a href="#">547558</a>               |
| Database:            | IMG-GEBA                   | 2502082111                           |
| MIGS-13              | Source material identifier | DSM 5219 <sup>T</sup>                |
|                      | Project relevance          | GEBA                                 |

**Supplementary Table 2.** Classification and general features of *Mhp. mahii* strain SLP<sup>T</sup> in accordance with the MIGS recommendations [36].

Evidence codes: TAS: Traceable Author Statement (i.e., a direct report exists in the literature); NAS: Non-traceable Author Statement (i.e., not directly observed for the living, isolated sample, but based on a generally accepted property for the species, or anecdotal evidence). These evidence codes are from the Gene Ontology project [74].

\* In version 4.0 of the BMSB Taxonomic Outline [18] the class “*Methanomicrobia*” (including the orders *Methanomicrobiales* and *Methanosarcinales*) was created to replace the class *Methanococci*, whose definition seems to be in conflict with current analyses of complete genome data.

| MIGS ID | Property               | Term                                                 | Evidence code |
|---------|------------------------|------------------------------------------------------|---------------|
|         |                        | Domain <i>Archaea</i>                                | TAS [75]      |
|         |                        | Phylum <i>Euryarchaeota</i>                          | TAS [76]      |
|         |                        | Class <i>Methanococci</i> *                          | TAS [73]      |
|         | Current classification | Order <i>Methanosarcinales</i>                       | TAS [76]      |
|         |                        | Family <i>Methanosarcinaceae</i>                     | TAS [77]      |
|         |                        | Genus <i>Methanohalophilus</i>                       | TAS [2]       |
|         |                        | Species <i>Methanohalophilus mahii</i>               | TAS [2]       |
|         |                        | Type strain SLP <sup>T</sup>                         | TAS [2]       |
|         | Gram stain             | negative                                             | TAS [2]       |
|         | Cell shape             | coccoid                                              | TAS [2]       |
|         | Motility nonm          | otile                                                | TAS [2]       |
|         | Sporulation negative   |                                                      | TAS [2]       |
|         | Temperature range      | 20 – 45 °C                                           | TAS [3]       |
|         | Optimum temperature    | 35°C                                                 | TAS [2]       |
|         | Salinity               | 0.5 M – 3.5 M NaCl                                   | TAS [3]       |
|         | Optimum salinity       | 1.2 – 2.0 M NaCl                                     | TAS [3]       |
| MIGS-22 | Oxygen requirement     | obligate anaerobic                                   | TAS [2]       |
| Carbon  | source                 | methanol, methylamine, dimethylamine, trimethylamine | TAS [2]       |
|         | Energy source          | see above                                            | TAS [2]       |
| MIGS-6  | Habitat                | saline to hypersaline anoxic sediments               | TAS [2]       |
| MIGS-15 | Biotic relationship    | unknown                                              |               |

|          |                        |                                        |          |
|----------|------------------------|----------------------------------------|----------|
| MIGS-14  | Pathogenicity          | none                                   | TAS [78] |
|          | Biosafety level        | 1                                      | TAS [78] |
|          | Isolation              | water/sediment sample                  | TAS [2]  |
| MIGS-4   | Geographic location    | Great Salt Lake (south arm), Utah, USA | TAS [3]  |
| MIGS-5   | Sample collection time | 1985 or before                         | NAS      |
| MIGS-4.1 | Latitude – Longitude   | 41.177 – -112.502                      | NAS      |
| MIGS-4.2 |                        |                                        |          |
| MIGS-4.3 | Depth                  | not reported                           |          |
| MIGS-4.4 | Altitude               | not reported                           |          |

---
